# Supplementary material
Source: Research Square preprint supplement (doi:10.21203/rs.3.rs-9361729/v1)
Supplement: Supplementary file 1 [file 1e78a7769645170eced17da2.docx]

**Supplementary Table 1. Model details.**

| Model | Description | Implementation | Class Imbalance Handling |
| --- | --- | --- | --- |
| LR | Standard logistic regression; models additive linear associations on the log-odds scale. | stats::glm(family = binomial()); predictors: birth year, sex, race/ethnicity, US nativity, income-to-poverty ratio. | None. |
| WLR | Identical to LR but fit under the NHANES complex survey design. | survey::svyglm(family = quasibinomial()); same predictors with NHANES MEC examination weights, strata, and PSU. | NHANES MEC examination weights applied. |
| GAM | Extends LR by allowing a smooth nonlinear effect for birth year; remaining predictors are additive. | mgcv::gam(); s(birth_year, k = 5) + linear terms; REML estimation. | None. |
| RF | Ensemble of decision trees capturing nonlinear effects and interactions automatically. | ranger probability forest; 1,000 trees, mtry = 2, min. node size = 10. | Training set downsampled to equal case/non-case counts. |
| XGB | Sequentially boosted shallow trees; captures nonlinear effects and interactions. | xgboost::xgb.train; eta = 0.05, max depth = 3, 300 rounds, early stopping at 30. | scale_pos_weight set to ratio of negatives to positives. |
| GLMNET | Penalized logistic regression; shrinks weak predictors to reduce overfitting. | glmnet::cv.glmnet(family = binomial, alpha = 0.5); lambda selected by 5-fold CV maximizing AUC. | None. |

**Supplementary Table 2. Baseline characteristics of current vs previous HCV infection among HCV antibody-positive participants with RNA results.**

| Variable | HCV antibody-positive with RNA result  (n = 888) | Current HCV infection  (n = 580) | Previous HCV infection  (n = 308) | p value |
| --- | --- | --- | --- | --- |
| **Male sex** | 62.50 | 66.03 | 55.84 | 0.003 |
| **Birth year** | 1958 (1952-1965) | 1957 (1951-1964) | 1960 (1955-1965) | <0.001 |
| **1911-1930** | 1.80 | 2.24 | 0.97 |  |
| **1931-1950** | 18.58 | 21.38 | 13.31 |  |
| **1951-1970** | 67.68 | 65.17 | 72.40 |  |
| **1971-1990** | 10.81 | 10.52 | 11.36 |  |
| **1991-2010** | 1.13 | 0.69 | 1.95 |  |
| **Race/ethnicity** |  |  |  | <0.001 |
| **Non-Hispanic White** | 42.34 | 38.97 | 48.70 |  |
| **Non-Hispanic Black** | 35.02 | 39.83 | 25.97 |  |
| **Hispanic** | 16.55 | 16.72 | 16.23 |  |
| **Asian or other** | 6.08 | 4.48 | 9.09 |  |
| **Birth place: USA-born** | 92.45 | 93.10 | 91.23 | 0.315 |
| **Education (n = 883)** |  |  |  | 0.013 |
| **Less than college** | 93.09 | 94.63 | 90.20 |  |
| **College or above** | 6.91 | 5.37 | 9.80 |  |
| **Health insurance**  **(n = 676)** |  |  |  | <0.001 |
| **Yes** | 75.44 | 69.73 | 83.88 |  |
| **No** | 24.56 | 30.27 | 16.12 |  |
| **Marital status (n = 880)** |  |  |  | 0.871 |
| **Married or living with partner** | 46.93 | 47.13 | 46.56 |  |
| **Widowed, divorced, separated, or never married** | 53.07 | 52.87 | 53.44 |  |
| **Alcohol use in past 12 months (n = 535)** |  |  |  | 0.218 |
| **>1/day** | 82.24 | 83.66 | 79.31 |  |
| **<=1/day** | 17.76 | 16.34 | 20.69 |  |
| **Smoking (n = 638)** |  |  |  | 0.004 |
| **Every day or some days** | 74.76 | 78.05 | 67.35 |  |
| **Never** | 25.24 | 21.95 | 32.65 |  |
| **Depression (n = 620)** |  |  |  | 0.873 |
| **Probable case** | 21.29 | 21.51 | 20.97 |  |
| **Not a probable case** | 78.71 | 78.49 | 79.03 |  |
| **Diabetes (n = 870)** | 15.86 | 13.49 | 20.40 | 0.008 |
| **CAD (n = 881)** | 6.47 | 5.72 | 7.89 | 0.212 |
| **Income to poverty ratio**  **(n = 888)** | 1.3  (0.8-2.4) | 1.2  (0.8-2.2) | 1.4  (0.9-2.9) | 0.010 |
| **BMI, kg/m2 (n = 863)** | 27.2  (23.5-31.2) | 26.6  (23.4-30.6) | 28.0  (23.8-32.2) | 0.026 |
| **HbA1c, % (n = 885)** | 5.5  (5.2-5.9) | 5.4  (5.2-5.8) | 5.6  (5.3-6.0) | 0.001 |
| **Glucose, mg/dl (n = 431)** | 102.0  (93.1-113.0) | 101.5  (93.0-112.8) | 104.0  (94.6-113.0) | 0.219 |
| **HDL, mg/dl (n = 744)** | 50.0  (40.8-63.0) | 50.0  (40.0-65.0) | 49.0  (41.0-60.0) | 0.489 |
| **LDL, mg/dl (n = 413)** | 97.0  (80.0-126.0) | 95.0  (78.0-119.0) | 107.5  (83.2-138.8) | 0.001 |
| **TG, mg/dl (n = 431)** | 97.0  (69.0-144.0) | 94.0  (68.0-134.5) | 102.0  (71.0-165.0) | 0.018 |
| **ALT, U/L (n = 877)** | 32.0  (21.0-54.0) | 44.0  (29.0-72.0) | 19.0  (14.0-25.0) | <0.001 |
| **AST, U/L (n = 877)** | 33.0  (23.0-50.0) | 42.0  (30.8-64.2) | 22.0  (18.0-27.0) | <0.001 |
| **ALP, U/L (n = 877)** | 75.0  (61.0-94.0) | 75.0  (62.0-95.2) | 75.0  (60.0-94.0) | 0.484 |
| **GGT, U/L (n = 877)** | 39.0  (22.0-86.0) | 57.5  (29.8-119.0) | 24.0  (17.0-36.0) | <0.001 |
| **TBil, mg/dl (n = 781)** | 0.6  (0.4-0.8) | 0.7  (0.5-0.9) | 0.5  (0.4-0.7) | <0.001 |
| **Creatinine, mg/dl**  **(n = 877)** | 0.9  (0.7-1.0) | 0.9  (0.7-1.0) | 0.8  (0.7-1.0) | 0.167 |
| **Platelets, x10^9/L**  **(n = 885)** | 229.0  (179.0-277.0) | 224.0  (177.5-269.0) | 239.5  (187.2-296.0) | 0.005 |

Categorical variables are shown as percentages; continuous variables are shown as median (Q1-Q3). Variable-specific sample sizes are shown in the row labels because data were not available for all participants across all NHANES cycles. P values compare current HCV infection and past HCV infection participants. HCV, hepatitis C virus; CAD, coronary artery disease; BMI, body mass index; HbA1c, hemoglobin A1c; HDL, high-density lipoprotein; LDL, low-density lipoprotein; TG, triglycerides; ALT, alanine aminotransferase; AST, aspartate aminotransferase; ALP, alkaline phosphatase; GGT, gamma-glutamyl transferase; TBil, total bilirubin.

**Supplementary Table 3. Baseline characteristics of training and validation cohorts.**

| Variable | Training  (n = 48,434) | Validation  (n = 20,762) | p value |
| --- | --- | --- | --- |
| **Male sex** | 49.33 | 47.69 | <0.001 |
| **Birth year** | 1976 (1954-1992) | 1976 (1955-1990) | <0.001 |
| **1911-1930** | 4.13 | 5.59 |  |
| **1931-1950** | 17.15 | 14.54 |  |
| **1951-1970** | 23.23 | 25.21 |  |
| **1971-1990** | 28.68 | 33.67 |  |
| **1991-2010** | 26.81 | 21.00 |  |
| **Race/ethnicity** |  |  | <0.001 |
| **Non-Hispanic White** | 40.27 | 46.80 |  |
| **Non-Hispanic Black** | 23.18 | 20.84 |  |
| **Hispanic** | 27.20 | 25.75 |  |
| **Asian or other** | 9.35 | 6.61 |  |
| **Birth place: USA-born** | 81.71 | 82.71 | 0.002 |
| **Education (n = 54,663)** |  |  | <0.001 |
| **Less than college** | 80.46 | 77.76 |  |
| **College or above** | 19.54 | 22.24 |  |
| **Health insurance (n = 48,516)** |  |  | <0.001 |
| **Yes** | 82.19 | 85.71 |  |
| **No** | 17.81 | 14.29 |  |
| **Marital status (n = 51,622)** |  |  | <0.001 |
| **Married or living with partner** | 54.96 | 50.74 |  |
| **Widowed, divorced, separated, or never married** | 45.04 | 49.26 |  |
| **Alcohol use in past 12 months (n = 29,693)** |  |  | 0.477 |
| **>1/day** | 64.99 | 65.42 |  |
| **<=1/day** | 35.01 | 34.58 |  |
| **Smoking (n = 35,220)** |  |  | 0.010 |
| **Every day or some days** | 27.41 | 26.06 |  |
| **Never** | 72.59 | 73.94 |  |
| **Depression (n = 32,990)** |  |  | 0.104 |
| **Probable case** | 9.19 | 9.78 |  |
| **Not a probable case** | 90.81 | 90.22 |  |
| **Diabetes (n = 68,046)** | 8.65 | 7.59 | <0.001 |
| **CAD (n = 46,223)** | 4.48 | 4.24 | 0.251 |
| **Income to poverty ratio**  **(n = 69,196)** | 1.9  (1.0-3.8) | 2.3  (1.1-4.1) | <0.001 |
| **BMI, kg/m2 (n = 68,202)** | 26.0  (21.6-30.9) | 25.9  (21.6-30.6) | 0.018 |
| **HbA1c, % (n = 60,318)** | 5.4  (5.1-5.7) | 5.3  (5.1-5.6) | <0.001 |
| **Glucose, mg/dl (n = 29,644)** | 98.0  (91.0-107.0) | 97.0  (90.0-105.0) | <0.001 |
| **HDL, mg/dl (n = 55,039)** | 51.0  (43.0-61.0) | 52.0  (44.0-63.0) | <0.001 |
| **LDL, mg/dl (n = 29,569)** | 104.0  (83.0-129.0) | 104.0  (82.0-130.0) | 0.544 |
| **TG, mg/dl (n = 30,485)** | 95.0  (65.0-143.0) | 98.0  (68.0-147.0) | <0.001 |
| **ALT, U/L (n = 59,613)** | 19.0  (15.0-26.0) | 19.0  (14.0-26.0) | <0.001 |
| **AST, U/L (n = 59,568)** | 22.0  (19.0-27.0) | 22.0  (18.0-26.0) | <0.001 |
| **ALP, U/L (n = 59,700)** | 73.0  (58.0-93.0) | 77.0  (61.0-100.0) | <0.001 |
| **GGT, U/L (n = 59,699)** | 18.0  (13.0-28.0) | 18.0  (13.0-27.0) | <0.001 |
| **TBil, mg/dl (n = 53,233)** | 0.6  (0.4-0.8) | 0.5  (0.4-0.7) | <0.001 |
| **Creatinine, mg/dl (n = 59,704)** | 0.8  (0.7-1.0) | 0.8  (0.7-1.0) | <0.001 |
| **Platelets, x10^9/L (n = 69,106)** | 252.0  (213.0-298.0) | 271.0  (229.0-320.0) | <0.001 |

Categorical variables are shown as percentages; continuous variables are shown as median (Q1-Q3). Variable-specific sample sizes are shown in the row labels because data were not available for all participants across all NHANES cycles. P values compare training and validation cohorts. HCV, hepatitis C virus; CAD, coronary artery disease; BMI, body mass index; HbA1c, hemoglobin A1c; HDL, high-density lipoprotein; LDL, low-density lipoprotein; TG, triglycerides; ALT, alanine aminotransferase; AST, aspartate aminotransferase; ALP, alkaline phosphatase; GGT, gamma-glutamyl transferase; TBil, total bilirubin.

**Supplementary Table 4. Model performance for current HCV infection prediction**

| **Cohort** | **Model** | **Sensitivity** | **Specificity** | **PPV** | **NPV** | **AUROC** |
| --- | --- | --- | --- | --- | --- | --- |
| **Training** | LR | 0.616 | 0.804 | 0.0275 | 0.996 | 0.802 |
|  | GAM | 0.791 | 0.805 | 0.0353 | 0.998 | 0.879 |
|  | GLMNET | 0.536 | 0.803 | 0.0240 | 0.995 | 0.793 |
|  | RF* | 0.906 | 0.806 | 0.0404 | 0.999 | 0.921 |
|  | WLR | 0.614 | 0.804 | 0.0274 | 0.996 | 0.796 |
|  | XGB | 0.852 | 0.806 | 0.0380 | 0.998 | 0.907 |
| **Validation** | LR | 0.588 | 0.803 | 0.0227 | 0.996 | 0.794 |
|  | GAM | 0.750 | 0.804 | 0.0290 | 0.998 | 0.863 |
|  | GLMNET | 0.538 | 0.803 | 0.0208 | 0.996 | 0.776 |
|  | RF | 0.713 | 0.804 | 0.0275 | 0.997 | 0.852 |
|  | WLR | 0.594 | 0.803 | 0.0230 | 0.996 | 0.791 |
|  | XGB* | 0.794 | 0.805 | 0.0307 | 0.998 | 0.867 |

Model performance was evaluated in the training and validation cohorts. Sensitivity, specificity, positive predictive value (PPV), and negative predictive value (NPV) were calculated using the cohort-specific 80th-percentile threshold for each model. Asterisks indicate the best-performing model in each cohort according to AUROC.

**Supplementary Figure 1. Study flow.**


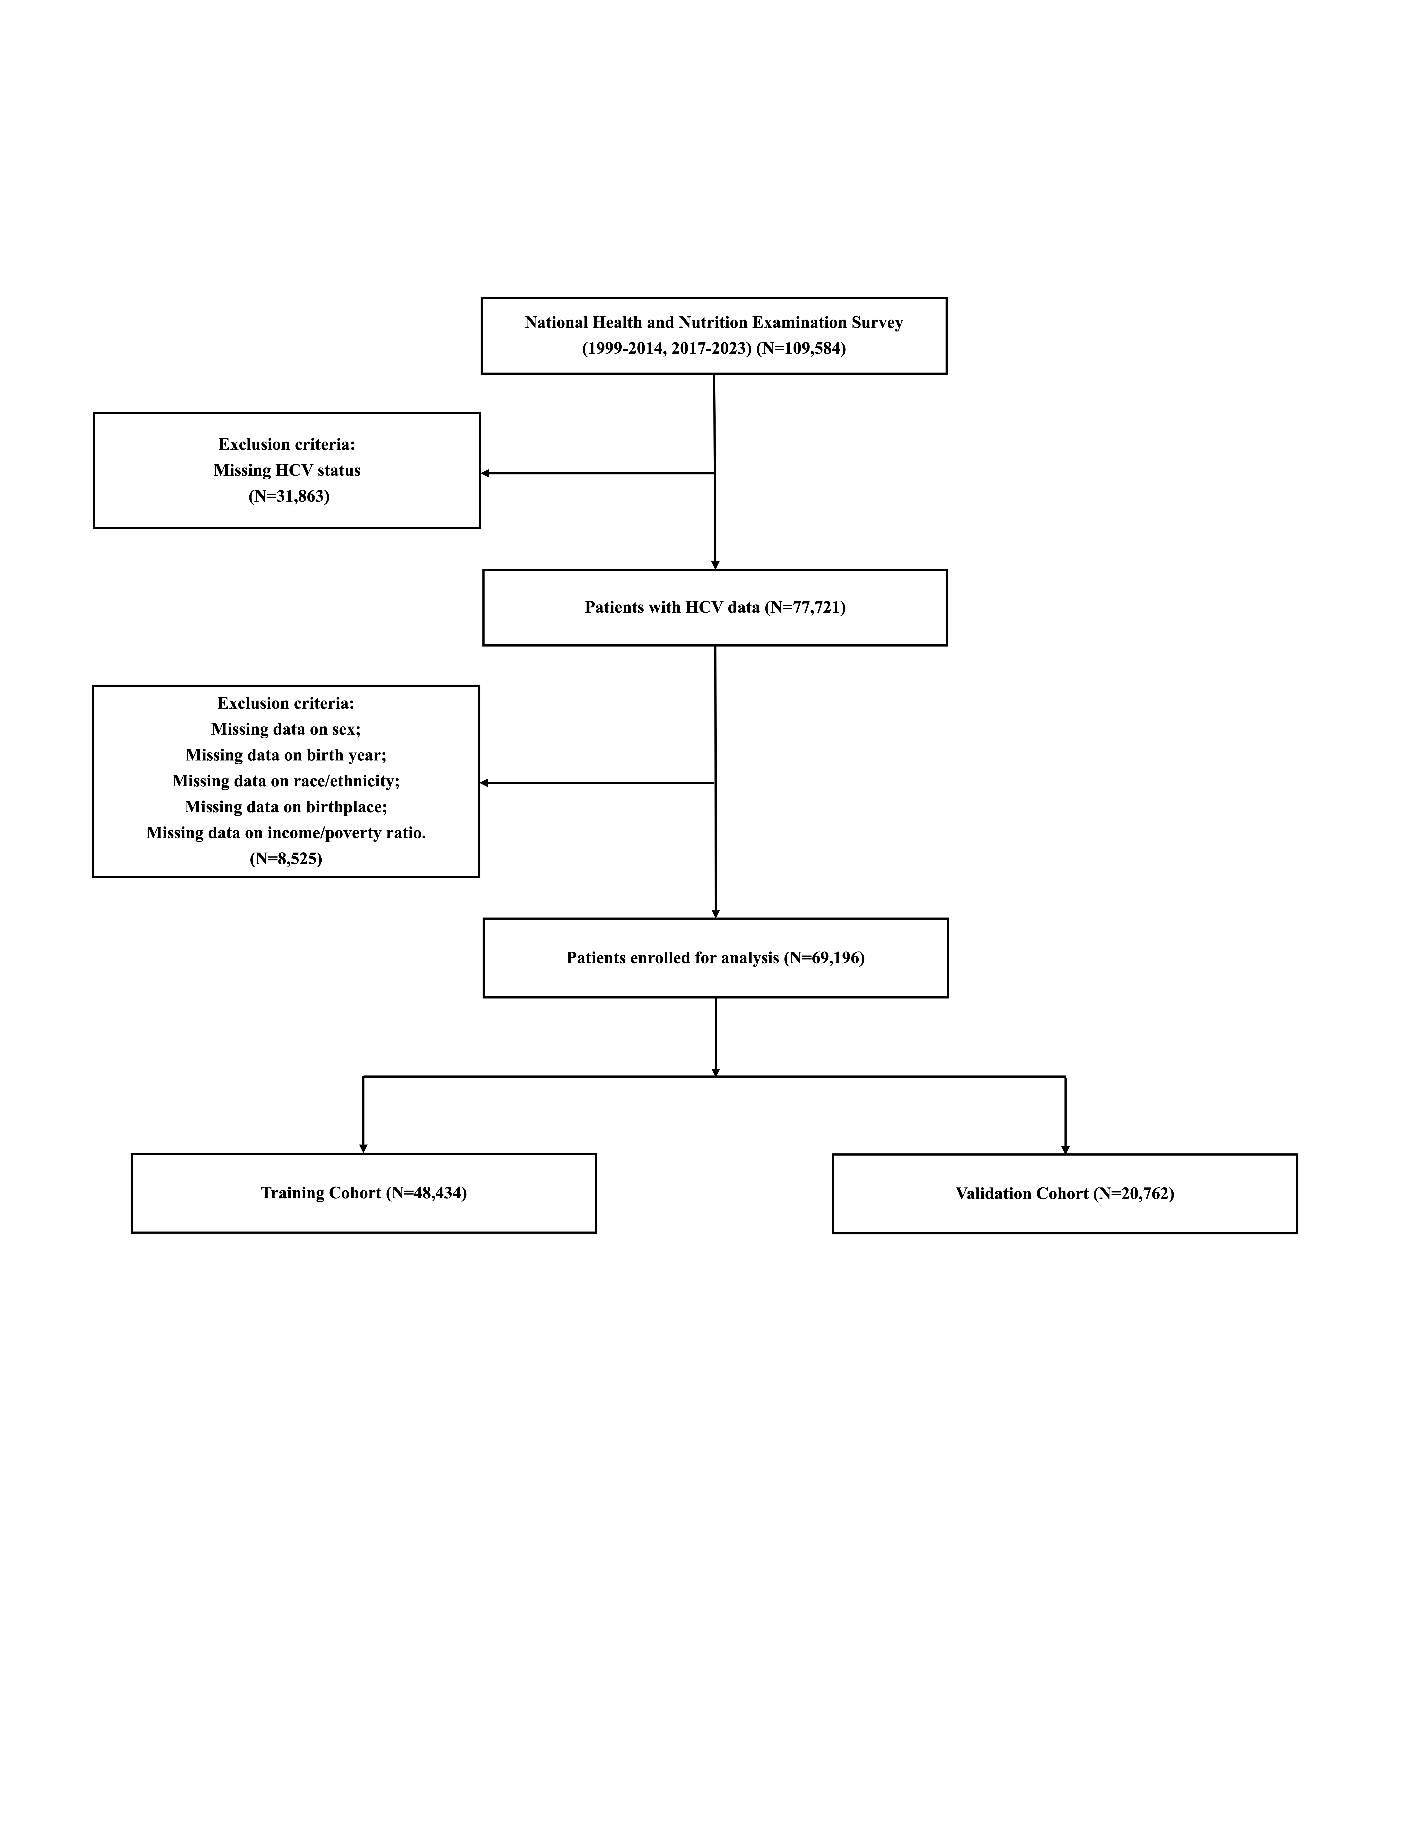


**Supplementary Figure 2. Weighted HCV prevalence across NHANES cycle year by sex and by race/ethnicity.**

**Supplementary Figure 3. ROC curve comparison across models for current infection.**

**
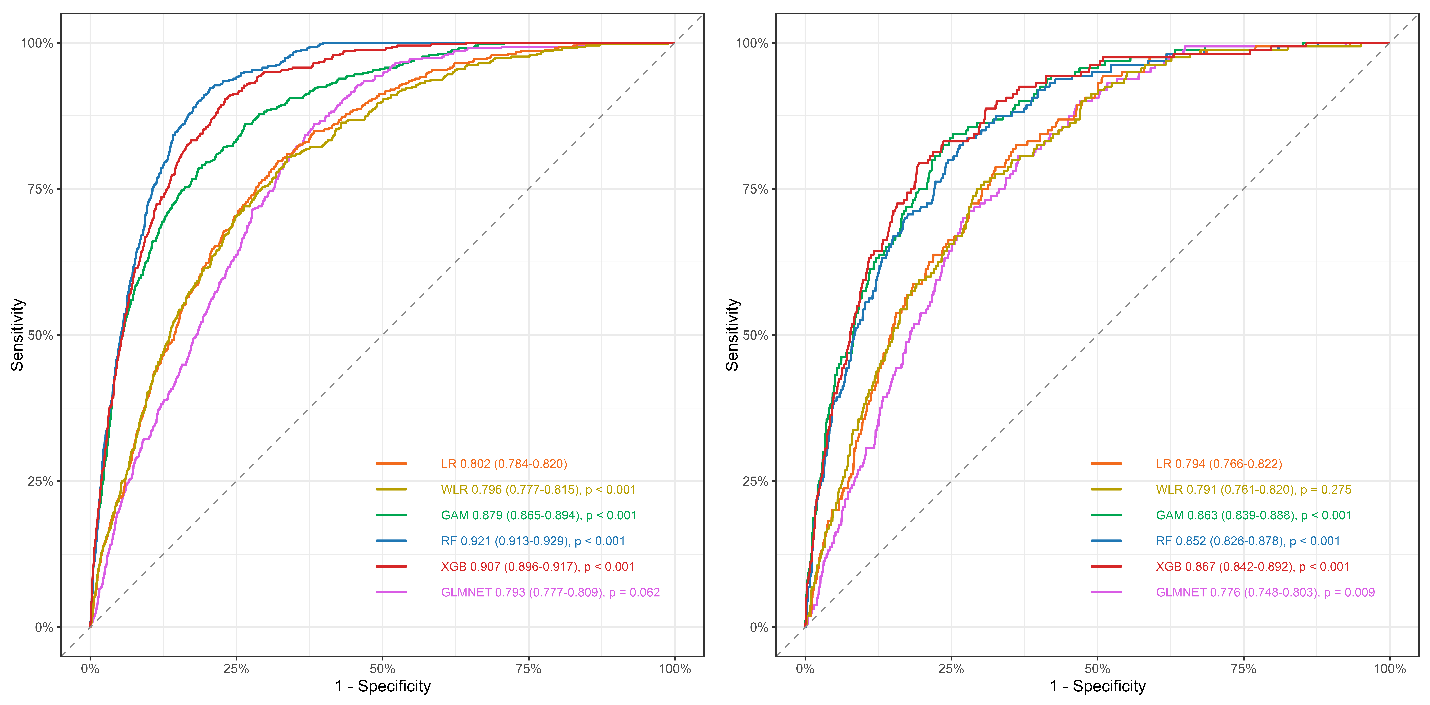
**

**Supplementary Figure 4. HCV infection risk and decile web calculator.**

**
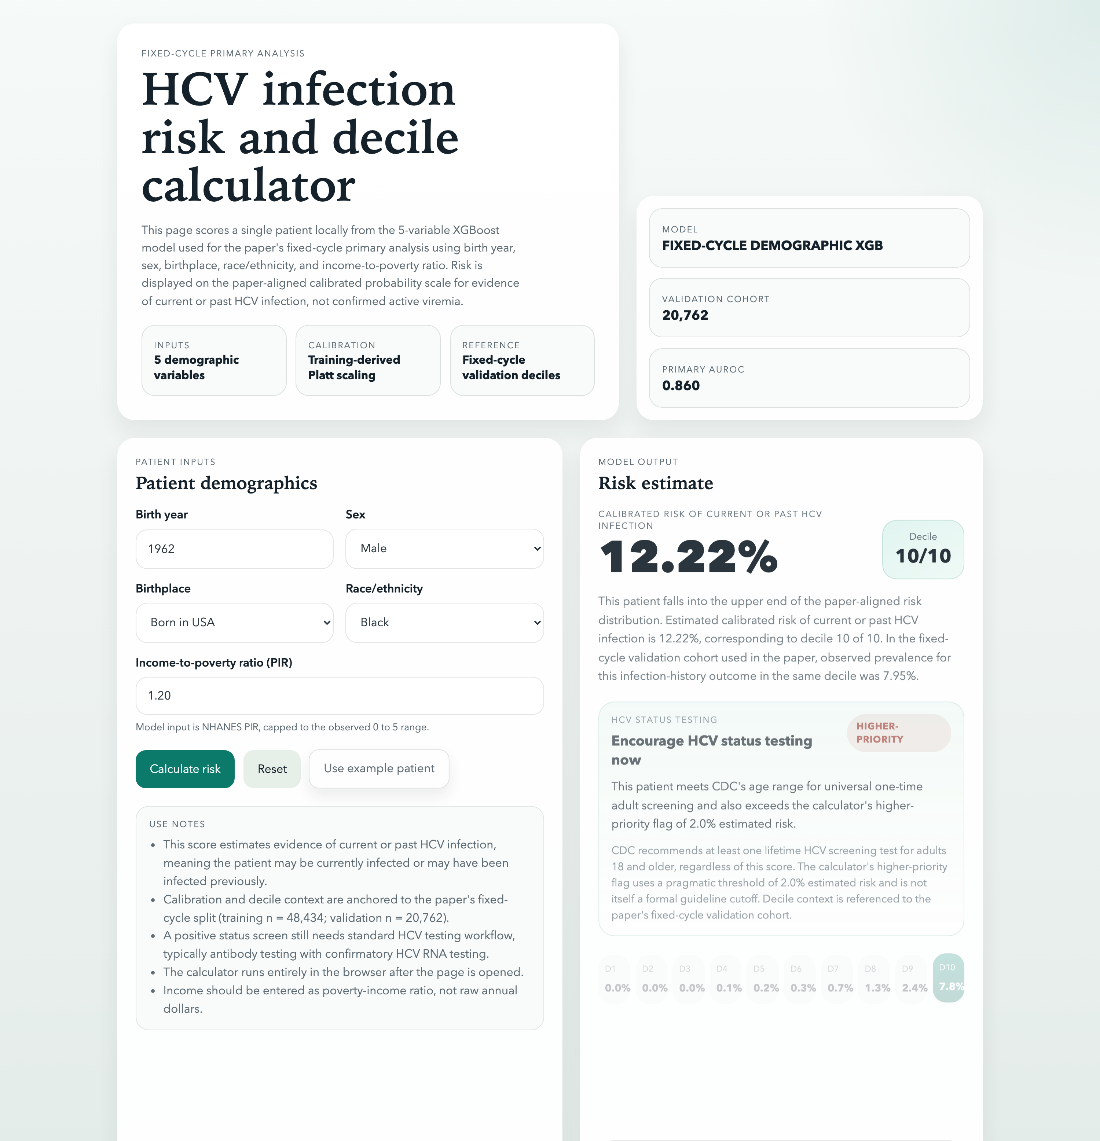
**
